# Supplementary material for: Mice lacking the mitochondrial exonuclease MGME1 accumulate mtDNA deletions without developing progeria
Source: PubMed Central journal article supplement (PMC5865154; doi:10.1038/s41467-018-03552-x), 2018-03-23
Supplement: 41467_2018_3552_MOESM2_ESM.pdf [file 41467_2018_3552_MOESM2_ESM.pdf]

## **Description of Additional Supplementary Files**

### **File Name: Supplementary Data 1**

**Description:** List of proteins identified in pull-down by MGME1-BirA\* (See enclosed Excel-File).

### **File Name: Supplementary Data 2**

**Description:** List of probes and antibodies.
